# Supplementary material for: The sea urchin animal pole domain is a Six3-dependent neurogenic patterning center
Source: Oxford University Press journal article supplement (doi:10.1242/dev.032300), 2009-03-06
Supplement: dev032300-sup-032300-figs1.pdf [file dev032300-sup-032300-figs1.pdf]

|               |                                                            |           |
|---------------|------------------------------------------------------------|-----------|
| Hssix3        | MVFRS-----PLDLYSSHFLLPNFA-DSHHRSSILLASSGGNGAGGGGGAGGGGGGGN | 52        |
| Ggsix3        | MVFRS-----PLELYPTHFPLPFAADPHHRSLLLAS-----GGSGSGGCS         | 43        |
| Xlsix3        | MVFRS-----PLELYPAHLFLPNFP-----ERSVLLSG-----                | 48        |
| Drsix3        | MVFRS-----PLELYPSHLFLPNA-----DRPLLAG-----                  | 28        |
| Sksix3        | -----                                                      | -----     |
| <b>Spsix3</b> | <b>MVWTETETSPSDRGAMRAAQALAQYYSLHDPRESSEGLAR-----</b>       | <b>39</b> |
| Dmsix3        | MAVGP-----TEGKQPPSESFSPTHH-----                            | 21        |
| Pcsix3/6-like | MPHLCS-----LTTGSN-----                                     | 13        |

|               |                                                                   |           |                                      |
|---------------|-------------------------------------------------------------------|-----------|--------------------------------------|
|               |                                                                   |           | <b>Groucho interaction</b>           |
| Hssix3        | GAGGGGAGGAGGGGGGSRAP-PEELS---MFQLP---TLNFSPEQVASVCETLEETGD        | 104       |                                      |
| Ggsix3        | GAGGG-----GGSSRAP-HEELS---MFQLP---TLNFSPEQVASVCETLEETGD           | 86        |                                      |
| Xlsix3        | -----PRA---QDELS---MFHLP---SLNFSPEQVASVCETLEETGD                  | 62        |                                      |
| Drsix3        | -----SIPRARSPELDP---MFQLP---TLNFSAEQVASVCETLEETGD                 | 66        |                                      |
| Sksix3        | -----MFQLP---TLNFSPLQVASVCETLEESGD                                | 26        |                                      |
| <b>Spsix3</b> | <b>-----LAHMYTSMQPFFVFPAAAPGGTFLPLPTALPTLCFSPPTQIASVCETLEESGD</b> | <b>91</b> |                                      |
| Dmsix3        | -----QIIAPSP-----ILAVP---TLAFSAQVEIVCKTLEESGD                     | 54        |                                      |
| Pcsix3/6-like | -----PLP-----FSAEQISKVCETLEECGD                                   | 34        |                                      |
|               |                                                                   |           | :*           **   * :   ** : ** : ** |

|               |                                                                     |            |                                                                       |
|---------------|---------------------------------------------------------------------|------------|-----------------------------------------------------------------------|
|               |                                                                     |            | <b>SIX DOMAIN</b>                                                     |
| Hssix3        | IERLGRFLWSLPVAPGACEAINKHESILRARAVVAFHTGNFRDLYHILENHKFTKESHGK        | 164        |                                                                       |
| Ggsix3        | IERLGRFLWSLPVAPGACEAINKHESILRARAVVAFHTGNFRDLYHILENHKFTKESHGK        | 146        |                                                                       |
| Xlsix3        | IERLGRFLWSLPVAPGACEAINKHESILRARAVVAFHTGNFRELYLLENHKFTKESHGK         | 122        |                                                                       |
| Drsix3        | IERLGRFLWSLPVAPGACDAINKHESIQRARAVVAYHTGFSFRELYHILETHKFTKDSHGK       | 126        |                                                                       |
| Sksix3        | IERLARFLWSLPVAPGTCEALNKNESVLRARAVVTFHQGNFRELYLLENHKFTKESHAK         | 86         |                                                                       |
| <b>Spsix3</b> | <b>IERLARFLWSLPVAPGTCEALSKNESVLRARAVVSFHQGNFRELYHILENHRFTKDSHAK</b> | <b>151</b> |                                                                       |
| Dmsix3        | IERLARFLWSLPVALPNMHEILNCEAVLRARAVVAYHVGNFRELYAIENHKFTKASYGK         | 114        |                                                                       |
| Pcsix3/6-like | IERLSRFLWSLPNNREVRELIINSNETILRSRAVVAFHNSHFHELYYLEHFRFNKSHGK         | 94         |                                                                       |
|               |                                                                     |            | *** . *****           . : . * : * : * : * : * . : : * : * : * . * : * |

|               |                                                                   |            |                                                           |
|---------------|-------------------------------------------------------------------|------------|-----------------------------------------------------------|
| Hssix3        | LQAMWLEAHYQEAELRGRPLGPVDKYRVRKKFPLPRTIWDGEOKTHCFKERTRSLLEW        | 224        |                                                           |
| Ggsix3        | LQAMWLEAHYQEAELRGRPLGPVDKYRVRKKFPLPRTIWDGEOKTHCFKERTRSLLEW        | 206        |                                                           |
| Xlsix3        | LQAMWLEAHYQEAELRGRPLGPVDKYRVRKKFPLPRTIWDGEOKTHCFKERTRSLLEW        | 182        |                                                           |
| Drsix3        | LQAMWLEAHYQEAELRGRPLGPVDKYRVRKKFPLPRTIWDGEOKTHCFKERTRSLLEW        | 186        |                                                           |
| Sksix3        | LQAMWLEAHYQEAELRGRPLGPVDKYRVRKKFPLPRTIWDGEOKTHCFKERTRSLLEW        | 146        |                                                           |
| <b>Spsix3</b> | <b>LQAMWLEAHYQEAELRGRPLGPVDKYRVRKKFPLPRTIWDGEOKTHCFKERTRSLLEW</b> | <b>211</b> |                                                           |
| Dmsix3        | LQAMWLEAHYIEAEKLRGRSLGPVDKYRVRKKFPLPRTIWDGEOKTHCFKERTRSLLEW       | 174        |                                                           |
| Pcsix3/6-like | LQAIWLEAHYLEAERLRGRPLGPVDKYRVRKRFPPLPRTIWDGEOKACFCFKERTRKLLEF     | 154        |                                                           |
|               |                                                                   |            | *** . *****   *** . ****   ***** . ***** . *****   **** : |

|               |                                                                    |            |                                                         |
|---------------|--------------------------------------------------------------------|------------|---------------------------------------------------------|
|               |                                                                    |            | <b>HOMEODOMAIN</b>                                      |
| Hssix3        | YLQDPYPNPSKKRELAQATGLTPTQVGNWFKNRRQRDRAAAAKNRLQHQAIQSGMRS          | 284        |                                                         |
| Ggsix3        | YLQDPYPNPSKKRELAQATGLTPTQVGNWFKNRRQRDRAAAAKNRLQHQAIQSGMRS          | 266        |                                                         |
| Xlsix3        | YLQDPYPNPSKKRELAQATGLTPTQVGNWFKNRRQRDRAAAAKNRLQHQAIQSGMRS          | 242        |                                                         |
| Drsix3        | YLQDPYPNPSKKRELAQATGLTPTQVGNWFKNRRQRDRAAAAKNRLQHQAIQSGMRS          | 246        |                                                         |
| Sksix3        | YLQDPYPNPTKKRELAQATGLTPTQVGNWFKNRRQRDRAAAAKNRLQSQHQ--QP            | 204        |                                                         |
| <b>Spsix3</b> | <b>YLQDPYPNPTKKRELAQATGLTPTQVGNWFKNRRQRDRAAAAKNRMQQQQQALQNSSVS</b> | <b>271</b> |                                                         |
| Dmsix3        | YLQDPYPNPTKKRELAQATGLNPTQVGNWFKNRRQRDRAAAAKNRIQLPQSLALNGASG        | 234        |                                                         |
| Pcsix3/6-like | YLQDPYSPSKKRDLDATHLTPTQVGNWFKNRRQRDRAAAAKNKSQRQEHALNTSSYE          | 214        |                                                         |
|               |                                                                    |            | ***** . * : * : * : * . * . ***** . ***** . *****   * : |

|               |                                                               |            |
|---------------|---------------------------------------------------------------|------------|
| Hssix3        | EPGCP-----THGSAESPSTAAS-PTTSVSSLTERADTGTSSILSVTSSDSECDV       | 332        |
| Ggsix3        | EPGCP-----THSSAESPSTAAS-PTTSVSSLTERAETGTSSILSVTSSDSECDV       | 314        |
| Xlsix3        | DPGCP-----THSSAESPSTAASPTTSVSSLAERAETATSSILSVTSSDSECDV        | 291        |
| Drsix3        | ESGCT-----PHSSAESPSTAAS-PTTSVSSMNERGDGGT-ILSVTSSDSDFDV        | 293        |
| Sksix3        | TSPNP-----IITVDGATTLPGQLTKQSLDPAHALLEATQNKSHPTPLSPTLA-        | 252        |
| <b>Spsix3</b> | <b>NSAHS-----PSLTEGATCLLSPHPDDHSPSP-RSLADSPPLDSPSPAGYHDDD</b> | <b>319</b> |
| Dmsix3        | PPLHH-----PAYAAAYSVECVPGGGHPPPPKLRINSPEKLNSTAVAAAASV          | 283        |
| Pcsix3/6-like | EDDDSDNLDDILDSDSDSDGDPRAKDKDTNEHKVSTEKRSFMVASILQKDDEPNKKL     | 274        |

|               |                   |            |
|---------------|-------------------|------------|
| Hssix3        | -----             |            |
| Ggsix3        | -----             |            |
| Xlsix3        | -----             |            |
| Drsix3        | -----             |            |
| Sksix3        | -----             |            |
| <b>Spsix3</b> | <b>DDDDL-----</b> | <b>324</b> |
| Dmsix3        | RGGGNQH-----      | 292        |
| Pcsix3/6-like | KNYFDNNIGSFLHTR   | 290        |
