# Supplementary figures and images for: The sea urchin animal pole domain is a Six3-dependent neurogenic patterning center
Source: Oxford University Press journal article supplement (doi:10.1242/dev.032300), 2009-03-06

A

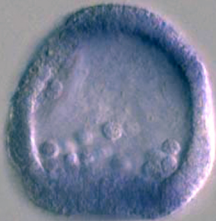

B

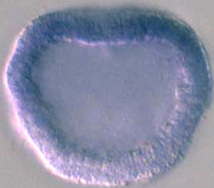

Supplement: dev032300-sup-032300-figs2.pdf [file dev032300-sup-032300-figs2.pdf]

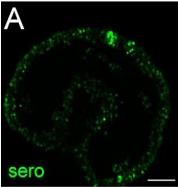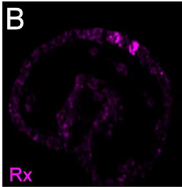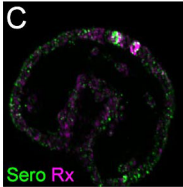

Supplement: dev032300-sup-032300-figs3.pdf [file dev032300-sup-032300-figs3.pdf]
